# Supplementary material for: Prevalence of vascular complications and factors predictive of their development in young adults with type 1 diabetes: systematic literature review
Source: PubMed Central journal article supplement (PMC4167503; doi:10.1186/1756-0500-7-593), 2014-09-02
Supplement: 13104_2014_3143_MOESM1_ESM.pdf [file 13104_2014_3143_MOESM1_ESM.pdf]

**Additional file 1: Search strategy.**

***Type 1 diabetes***

1. 'Diabetes Mellitus, Type 1'; or 'Type 1 diabetes'; or 'Insulin Dependent Diabetes Mellitus'; or 'Juvenile Onset Diabetes Mellitus'

***Vascular complications***

2. 'Diabetic Retinopathy'; or 'Retinopathy'; or 'Eye Diseases'
3. 'Diabetic Nephropathies'; or 'Nephropathy'; or 'Kidney Diseases'
4. 'Hypertension'; or 'High Blood Pressure'
5. 2 OR 3 OR 4

***Prevalence***

6. 'Prevalence'; or 'Cross-sectional Studies'; or 'Prospective Studies'; or 'Longitudinal Studies'

***Summary***

7. 1 AND 5 AND 6
