# Supplementary material for: Prevalence of vascular complications and factors predictive of their development in young adults with type 1 diabetes: systematic literature review
Source: PubMed Central journal article supplement (PMC4167503; doi:10.1186/1756-0500-7-593), 2014-09-02
Supplement: 13104_2014_3143_MOESM2_ESM.pdf [file 13104_2014_3143_MOESM2_ESM.pdf]

|                                                                         |     |     |     |   |     |     |     |     |     |   |     |
|-------------------------------------------------------------------------|-----|-----|-----|---|-----|-----|-----|-----|-----|---|-----|
| <b>Statistical methods</b>                                              | √   | √   | √   | √ | √   | √   | √   | √   | √   | √ | √   |
| <b>Results</b>                                                          |     |     |     |   |     |     |     |     |     |   |     |
| <b>Participants</b>                                                     | N/A | √   | √   | √ | N/A | √   | X   | √   | N/A | √ | N/A |
| <b>Descriptive data</b>                                                 | √   | √   | √   | √ | √   | √   | √   | √   | √   | √ | √   |
| <b>Outcome data</b>                                                     | √   | √   | √   | √ | √   | √   | √   | √   | √   | √ | √   |
| <b>Main results</b>                                                     | √   | √   | √   | √ | √   | √   | √   | √   | √   | √ | √   |
| <b>Other analysis</b>                                                   | √   | √   | √   | √ | √   | √   | √   | √   | √   | √ | X   |
| <b>Discussion</b>                                                       |     |     |     |   |     |     |     |     |     |   |     |
| <b>Key results</b>                                                      | √   | √   | √   | √ | √   | √   | √   | √   | √   | √ | √   |
| <b>Limitations</b>                                                      | √   | √   | X   | √ | X   | √   | X   | X   | X   | √ | X   |
| <b>Interpretation</b>                                                   | √   | √   | √   | √ | √   | √   | √   | √   | √   | √ | √   |
| <b>Generalisability</b>                                                 | √   | √   | X   | √ | √   | √   | √   | √   | X   | X | √   |
| <b>Other information</b>                                                |     |     |     |   |     |     |     |     |     |   |     |
| <b>Funding</b>                                                          | √   | √   | √   | √ | √   | √   | √   | X   | √   | X | √   |
| <b>Assessment and measurement according to best practice guidelines</b> |     |     |     |   |     |     |     |     |     |   |     |
| <b>Diabetic retinopathy</b>                                             | √   | √   | N/A | √ | N/A | √   | √   | √   | N/A | √ | N/A |
| <b>Nephropathy</b>                                                      | N/A | √   | √   | X | X   | N/A | X   | X   | X   | X | N/A |
| <b>Hypertension</b>                                                     | N/A | N/A | X   | √ | X   | N/A | N/A | N/A | N/A | X | X   |

(N/A) Not applicable
