# Supplementary material for: Prevalence of vascular complications and factors predictive of their development in young adults with type 1 diabetes: systematic literature review
Source: PubMed Central journal article supplement (PMC4167503; doi:10.1186/1756-0500-7-593), 2014-09-02
Supplement: 13104_2014_3143_MOESM3_ESM.pdf [file 13104_2014_3143_MOESM3_ESM.pdf]

**Additional file 3: Summary of extracted information from included literature.**

| Aims/purpose/research question; study design; setting; data collection dates; sampling strategy; sample size and characteristics                                                                                                                                                                                                                                                                                                                                                                                                                                                                                                                                                                                                                                                                                                                                                                                                                                                                                                                              | Method(s) of complication assessment | Relevant findings (excluding data on predictors)                                            |
|---------------------------------------------------------------------------------------------------------------------------------------------------------------------------------------------------------------------------------------------------------------------------------------------------------------------------------------------------------------------------------------------------------------------------------------------------------------------------------------------------------------------------------------------------------------------------------------------------------------------------------------------------------------------------------------------------------------------------------------------------------------------------------------------------------------------------------------------------------------------------------------------------------------------------------------------------------------------------------------------------------------------------------------------------------------|--------------------------------------|---------------------------------------------------------------------------------------------|
| <b>Arfken et al. 1998</b>                                                                                                                                                                                                                                                                                                                                                                                                                                                                                                                                                                                                                                                                                                                                                                                                                                                                                                                                                                                                                                     |                                      |                                                                                             |
| <p>To compare the risk of developing proliferative DR in African-American and White participants with type 1 diabetes</p> <p>Cross-sectional design; case note audit</p> <p>U.S.A.; ‘model demonstration units’, number unclear</p> <p>Data collection period unclear</p> <p>Sampling strategy unclear; inclusion criteria: subjects with type 1 diabetes (age of onset of <math>\leq 40</math> years, continuous insulin usage); African-American or White; at least 2 visits with gradable eye photographs; if <math>&gt; 2</math> visits, visits chosen to maximise follow-up duration</p> <p>n 312 (n 97 (African-American participants); n 215 (White participants))</p> <p>*Age: 27.0 (15.0) years (African-American participants); 19.0 (11.0) years (White participants); <math>p = 0.0001</math></p> <p>Male: 32% (African-American participants); 45% (White participants); <math>p &lt; 0.03</math></p> <p>*Diabetes duration: 9.2 (7.0) years (African-American participants); 8.0 (6.4) years (White participants); <math>p &lt; 0.15</math></p> | <p><b>DR</b></p> <p>Photography</p>  | <p><b>DR</b></p> <p>Proliferative: 17.5% (African-American); 10.2% (White participants)</p> |



|                                                                                                                                                                                                                                                                                                                                                                                                                                                                                                                                                                                                                                                                                                                                                                                                                                                                                                                                                                                                                                                                                                                                                                                                  |                                                                                                                                                                                                                                                                                                                                                                                                                                                                                                                                                                                                                                                                                                              |                                                                                                                                                                                                                                                                                                                                                                                                                                                                                                                                                                                                                                                                                    |
|--------------------------------------------------------------------------------------------------------------------------------------------------------------------------------------------------------------------------------------------------------------------------------------------------------------------------------------------------------------------------------------------------------------------------------------------------------------------------------------------------------------------------------------------------------------------------------------------------------------------------------------------------------------------------------------------------------------------------------------------------------------------------------------------------------------------------------------------------------------------------------------------------------------------------------------------------------------------------------------------------------------------------------------------------------------------------------------------------------------------------------------------------------------------------------------------------|--------------------------------------------------------------------------------------------------------------------------------------------------------------------------------------------------------------------------------------------------------------------------------------------------------------------------------------------------------------------------------------------------------------------------------------------------------------------------------------------------------------------------------------------------------------------------------------------------------------------------------------------------------------------------------------------------------------|------------------------------------------------------------------------------------------------------------------------------------------------------------------------------------------------------------------------------------------------------------------------------------------------------------------------------------------------------------------------------------------------------------------------------------------------------------------------------------------------------------------------------------------------------------------------------------------------------------------------------------------------------------------------------------|
| <b>Garg et al. 1997</b>                                                                                                                                                                                                                                                                                                                                                                                                                                                                                                                                                                                                                                                                                                                                                                                                                                                                                                                                                                                                                                                                                                                                                                          |                                                                                                                                                                                                                                                                                                                                                                                                                                                                                                                                                                                                                                                                                                              |                                                                                                                                                                                                                                                                                                                                                                                                                                                                                                                                                                                                                                                                                    |
| <p>To determine the relationship between 24-hour ambulatory BP measurements and early renal disease</p> <p>Cross-sectional design</p> <p>U.S.A.; 1 eye/kidney clinic</p> <p>Data collection period unclear</p> <p>Consecutive sampling; inclusion criteria: subjects with type 1 diabetes who had completed the 24-hour ambulatory BP measurements, brought in two timed overnight urine specimens and who attended the clinic were included; exclusion criteria: subjects with a body-mass index greater than 120% of normal for their age and gender</p> <p>n 150 (n 86 (normal AER); n 29 (borderline AER elevation); n 24 (microalbuminuria); n 11 (macroalbuminuria))</p> <p>*Age: 22.6 (3.3) years (normal AER 22.7 (0.5) years; borderline AER elevation 21.3 (0.6) years; microalbuminuria 23.0 (0.6) years; macroalbuminuria 24.3 (1.0) years)</p> <p>Male: 51.3% (normal AER 52.3%; borderline AER elevation 51.7%; microalbuminuria 45.8%; macroalbuminuria 54.6%)</p> <p>*Diabetes duration: 12.8 (5.0) years (range, 3.5 - 25.8) (normal AER 12.8 (0.6) years; borderline AER elevation 11.1 (0.8) years; microalbuminuria 13.7 (1.0) years; macroalbuminuria 15.0 (1.8) years)</p> | <p><b>HT</b><br/>Ambulatory BP measurements were taken by an oscillometric portable automatic monitor every 30 minutes from 6 a.m. to 10 p.m. and every hour from 10 p.m. to 6 a.m.; readings were downloaded. Office BPs were measured using the appropriate sized cuff and a sphygmomanometer after resting in sitting position for 5 minutes</p> <p>HT &gt; 140/90 mmHg</p> <p><b>Nephropathy</b><br/>Overnight urine collections taken on nights with no evening exercise, alcohol or caffeine intake and when menses, pregnancy, or urinary tract infections were absent</p> <p>Borderline elevation:<br/>AER 7.6 - 20 µg/min<br/>Microalbuminuria:<br/>AER 20.1 - 200 µg/min<br/>Macroalbuminuria:</p> | <p><b>HT</b><br/>% 24-hour ambulatory BP measurements indicating -<br/>Systolic HT: borderline AER elevation 12.3% (2.8); microalbuminuria 6% (1.8); macroalbuminuria 40.2% (7.6); p &lt; 0.0001<br/>Diastolic HT: borderline AER elevation 11.1% (2.6); microalbuminuria 7.8% (1.5); macroalbuminuria 39.3% (8.8); p &lt; 0.0001</p> <p>% of ambulatory BP measurements &gt; 90% percentile (mean of 24-hours) -<br/>Systolic: borderline AER elevation 48.3% (5.1); microalbuminuria 37.8% (4.9); macroalbuminuria 72.5% (8.4); p &lt; 0.0002<br/>Diastolic: borderline AER elevation 47.3% (4.3); microalbuminuria 40.5% (4.1); macroalbuminuria 64.9% (10.5), p &lt; 0.002</p> |

|                                                                                                                                                                                                                                                                                                                                                                                                                                                                                                                                                                                                                                                                                                                                                                                                                                                                                      |                                                                                                                                                                                                                                           |                                                                                                                                                                                                                                                                                                                                                                                                            |
|--------------------------------------------------------------------------------------------------------------------------------------------------------------------------------------------------------------------------------------------------------------------------------------------------------------------------------------------------------------------------------------------------------------------------------------------------------------------------------------------------------------------------------------------------------------------------------------------------------------------------------------------------------------------------------------------------------------------------------------------------------------------------------------------------------------------------------------------------------------------------------------|-------------------------------------------------------------------------------------------------------------------------------------------------------------------------------------------------------------------------------------------|------------------------------------------------------------------------------------------------------------------------------------------------------------------------------------------------------------------------------------------------------------------------------------------------------------------------------------------------------------------------------------------------------------|
|                                                                                                                                                                                                                                                                                                                                                                                                                                                                                                                                                                                                                                                                                                                                                                                                                                                                                      | AER > 200 µg/min                                                                                                                                                                                                                          |                                                                                                                                                                                                                                                                                                                                                                                                            |
| <b>James et al. 2014</b>                                                                                                                                                                                                                                                                                                                                                                                                                                                                                                                                                                                                                                                                                                                                                                                                                                                             |                                                                                                                                                                                                                                           |                                                                                                                                                                                                                                                                                                                                                                                                            |
| <p>To identify the prevalence and factors predictive of development of vascular complications in a cohort of young adults with type 1 diabetes</p> <p>Cross-sectional design; case note audit</p> <p>Australia; number unclear</p> <p>Data collected 2010 - 2011</p> <p>Participants accessing Hunter New England Local Health District public health services, identified through clinic records, hospital attendances and other clinical records</p> <p>n 707 (n 682 (2010); n 707 (2011))<br/> Ophthalmic examinations documented: n 95 (2010); n 85 (2011)<br/> ACR measurements documented: n 222 (2010); n 218 (2011)<br/> BP measurements documented: n 313 (2010); n 306 (2011)</p> <p>*Age: 23.0 (3.7) years<br/> Male: 54.3%<br/> *Diabetes duration: 10.2 (5.8) (range 0.2 - 28.3) years<br/> Aboriginal and/or Torres Strait Islander 5.6%; Rural participants 42.4%</p> | <p><b>DR</b><br/> Documented</p> <p><b>Nephropathy</b><br/> ≥ one reported ACR measurement above laboratory threshold normal value</p> <p><b>HT</b><br/> ≥ 130/80 mmHg per annum, and/or prescription of anti-hypertensive medication</p> | <p><b>DR</b><br/> 2010 -<br/> Any: 13.7%</p> <p>2011 -<br/> Any: 9.4%</p> <p><b>Nephropathy</b><br/> 2010 -<br/> ≥ one ACR measurement above laboratory threshold value: 15.1%</p> <p>2011 -<br/> ≥ one ACR measurement above laboratory threshold value: 16.1%</p> <p>≥ two above threshold value: 12.4%</p> <p><b>HT</b><br/> 2010:<br/> ≥ 130/80 mmHg: 33.9%</p> <p>2011:<br/> ≥ 130/80 mmHg: 30.7%</p> |



|                                                                                                                                                                                                                                                                                                                                                                                                                                                                                                                                                                                                                                                                                                                                                                                                                                                                                                                                                                                                                                                                                                                                                                                                                                                                                   |                                  |                                                                                                                                                                                                                                                                                                                     |
|-----------------------------------------------------------------------------------------------------------------------------------------------------------------------------------------------------------------------------------------------------------------------------------------------------------------------------------------------------------------------------------------------------------------------------------------------------------------------------------------------------------------------------------------------------------------------------------------------------------------------------------------------------------------------------------------------------------------------------------------------------------------------------------------------------------------------------------------------------------------------------------------------------------------------------------------------------------------------------------------------------------------------------------------------------------------------------------------------------------------------------------------------------------------------------------------------------------------------------------------------------------------------------------|----------------------------------|---------------------------------------------------------------------------------------------------------------------------------------------------------------------------------------------------------------------------------------------------------------------------------------------------------------------|
| <p>*Diabetes duration at fundus photo: A3 9.4 (1.8) years; A4 9.8 (1.6) years</p>                                                                                                                                                                                                                                                                                                                                                                                                                                                                                                                                                                                                                                                                                                                                                                                                                                                                                                                                                                                                                                                                                                                                                                                                 |                                  |                                                                                                                                                                                                                                                                                                                     |
| <p><b>LeCaire et al. 2006</b></p>                                                                                                                                                                                                                                                                                                                                                                                                                                                                                                                                                                                                                                                                                                                                                                                                                                                                                                                                                                                                                                                                                                                                                                                                                                                 |                                  |                                                                                                                                                                                                                                                                                                                     |
| <p>To examine development of DR in a population-based cohort of persons with incident type 1 diabetes, to investigate the possibility of lowered DR prevalence and severity compared with previous U.S. studies</p> <p>Longitudinal cohort study</p> <p>U.S.A.; number of centres unclear</p> <p>Voluntary recruitment to cohort with inclusion criteria: type 1 diabetes diagnosed from May 1987 - April 1992; <math>\leq 30</math> years of age; living within defined area in Southern and Central Wisconsin</p> <p>n 474 (n 420 (4 years diabetes duration (T1)); n 275 (7 years diabetes duration (T2)); n 290 (9 years diabetes duration (T3)); n 68 (14 years diabetes duration (T4)))</p> <p>*Age: T1 14.1 (6.2) years (DR -); 19.5 (7.0) years (DR +) (<math>P \leq 0.0001</math>). T2 16.1 (6.6) years (DR -); 19.5 (6.4) years (DR +) (<math>P \leq 0.01</math>). T3 18.8 (7.2) years (DR -); 21.1 (6.4) years (DR +) (<math>P \leq 0.01</math>). T4 22.2 (8.2) years (DR -); 24.8 (6.3) years (DR +)</p> <p>Male: T1 51% (DR -); 52% (DR +). T2 49% (DR -); 48% (DR +). T3 49% (DR -); 57% (DR +). T4 39% (DR -); 46% (DR +)</p> <p>Ethnicity (White) T1 96% (DR -); 96% (DR +). T2 96% (DR -); 90% (DR +). T3 99% (DR -); 95% (DR +). T4 100% (DR -); 98% (DR +)</p> | <p><b>DR</b><br/>Photography</p> | <p><b>DR</b><br/>Any: T1 6%; T2 23%; T3 47%; T4 73%<br/>Minimal non-proliferative: T1 5%; T2 18%; T3 33%; T4 44%<br/>Mild non-proliferative: T1 1%; T2 4%; T3 11%; T4 19%<br/>Moderate - severe non-proliferative: T1 0.2%; T2 0.4%; T3 2%; T4 10%<br/>Proliferative or treated: T1 0%; T2 0.4%; T3 0.3%; T4 0%</p> |

**Olsen et al. 1999**

To estimate the prevalence of present glycaemic control and the prevalence of microvascular complications in a cohort of children and adolescents who had participated in 2 previous studies

Longitudinal cohort study

Denmark; 19 paediatric departments and five departments of internal medicine

Selection of participants from two previous studies (1987 and 1989)

Study n 339 (n 205 > 20 years of age of which n 190 assessed for DR, and n 192 assessed for nephropathy); Median age 21.1 years (range 12.0 - 26.9), male 53.1% and duration 13.2 years (8.9 - 24.5). n and characteristics of sample > 20 years not reported

**DR**  
Photography

**Nephropathy**  
Two consecutive overnight timed urine samples. If AER was > 20 µg/min in one of the two samples a third sample was collected. The mean of 2 consistent AER samples was used in the analysis

Microalbuminuria:  
AER of 20 - 150 µg/min  
Macroalbuminuria:  
AER >150 µg/min

*Age > 20 years:*

**DR**  
Minimal non-proliferative: 48.9%  
Moderate non-proliferative plus: 20%

**Nephropathy**  
Microalbuminuria: 9.4%  
Macroalbuminuria: 4.7%

**Olsen et al. 2004**

To determine the effect of the pre-pubertal duration of diabetes on early DR and elevated AER

Longitudinal cohort study

**DR**  
Photography

**DR**  
Any: 57.6%

|                                                                                                                                                                                                                                                                                                                                                                                                                                                                                                                                                                                                                                                                                                                                                                                                                                 |                                                                                                                                                                                                                                                         |                                                                                                                   |
|---------------------------------------------------------------------------------------------------------------------------------------------------------------------------------------------------------------------------------------------------------------------------------------------------------------------------------------------------------------------------------------------------------------------------------------------------------------------------------------------------------------------------------------------------------------------------------------------------------------------------------------------------------------------------------------------------------------------------------------------------------------------------------------------------------------------------------|---------------------------------------------------------------------------------------------------------------------------------------------------------------------------------------------------------------------------------------------------------|-------------------------------------------------------------------------------------------------------------------|
| <p>Denmark; 19 paediatric departments and six departments of internal medicine</p> <p>Selection of participants from an earlier study. Eight year follow-up data (1995 - 1996)</p> <p>n 353 (n 304 (Onset of diabetes &lt; 12 years (pre-pubertal); n 49 (Onset of diabetes ≥ 12 years (pubertal/postpubertal))); n 339 had urine samples taken</p> <p>*Age: 20.4 (3.2) years (Onset of diabetes &lt; 12 (pre-pubertal)); 24.2 (1.3) years (Onset of diabetes ≥ 12 years (pubertal/post-pubertal)); p &lt; 0.0001<br/>Male: 51.3% (Onset of diabetes &lt; 12 years (pre-pubertal)); 65.3% (Onset of diabetes ≥ 12 years (pubertal/post-pubertal))<br/>*Duration: 13.8 (3.2) years (Onset of diabetes &lt;12 years (pre-pubertal)); 10.7 (1.3) years (Onset of diabetes ≥ 12 years (pubertal/post-pubertal)); p &lt; 0.0001)</p> | <p><b>Nephropathy</b><br/>Two out of three consecutive overnight timed urine samples</p> <p>Microalbuminuria:<br/>AER 20 - 150 µg/min<br/>Macroalbuminuria:<br/>AER &gt;150 µg/min</p>                                                                  | <p><b>Nephropathy</b><br/>AER &gt; 20 µg/min: 12.7%</p>                                                           |
| <p><b>Raile et al. 2007</b></p>                                                                                                                                                                                                                                                                                                                                                                                                                                                                                                                                                                                                                                                                                                                                                                                                 |                                                                                                                                                                                                                                                         |                                                                                                                   |
| <p>To analyse the prevalence of nephropathy in a nationwide prospective survey</p> <p>Prospective cross-sectional design, documentation survey</p> <p>Germany and Austria; 262 centres</p> <p>Data collection period unclear but ceased February 2007</p>                                                                                                                                                                                                                                                                                                                                                                                                                                                                                                                                                                       | <p><b>Nephropathy</b><br/>Measurement of ACR in a random spot collection, 24-hour collection with creatinine, or timed (e.g. overnight) collection.</p> <p>Microalbuminuria or macroalbuminuria was defined as at least two increased urine albumin</p> | <p><b>Nephropathy</b><br/>Microalbuminuria: 3.3%<br/>Macroalbuminuria: 0.2%<br/>End stage renal disease: 0.8%</p> |



|                                                                                                                                                                                                                                                                                                                                                                                                                                                                                                                                                                                                                                                                                                                 |                                                                                                                                                                                                                                                                                                                                                  |                                                                                                                                                                                                                                                                                                                                                         |
|-----------------------------------------------------------------------------------------------------------------------------------------------------------------------------------------------------------------------------------------------------------------------------------------------------------------------------------------------------------------------------------------------------------------------------------------------------------------------------------------------------------------------------------------------------------------------------------------------------------------------------------------------------------------------------------------------------------------|--------------------------------------------------------------------------------------------------------------------------------------------------------------------------------------------------------------------------------------------------------------------------------------------------------------------------------------------------|---------------------------------------------------------------------------------------------------------------------------------------------------------------------------------------------------------------------------------------------------------------------------------------------------------------------------------------------------------|
| <p>Sample from German Diabetes Documentation System with inclusion criteria of at least 2 documented urine analyses; strategy unclear</p> <p>n 27,805 (n 26,644 (normal). n 919 (microalbuminuria); n 52/229 (macroalbuminuria/end stage renal disease)</p> <p>*Age at last visit: 21.1 (0.1) years (normal); 28.7 (0.6) years (microalbuminuria); 37.2 (1.2) years (macroalbuminuria/ end stage renal disease); p &lt; 0.0001</p> <p>Male: 52.6% (normal); 52.1% (microalbuminuria); 58% (macroalbuminuria/end stage renal disease)</p> <p>*Diabetes duration: 8.3 (0.05) years (normal); 12.6 (0.4) years (microalbuminuria); 20.1 (0.9) years (macroalbuminuria/ end stage renal disease); p &lt; 0.0001</p> | <p>tests during the follow-up</p> <p>Microalbuminuria: AER 20 - 199 <math>\mu\text{g}/\text{min}</math> or an urinary albumin creatinine <math>\geq 2.5 \text{ mg}/\text{mmol}</math></p> <p>Macroalbuminuria: AER <math>\geq 200 \mu\text{g}/\text{min}</math> or an urinary albumin creatinine <math>\geq 35 \text{ mg}/\text{mmol}</math></p> |                                                                                                                                                                                                                                                                                                                                                         |
| <p><b>Salardi et al. 2012</b></p>                                                                                                                                                                                                                                                                                                                                                                                                                                                                                                                                                                                                                                                                               |                                                                                                                                                                                                                                                                                                                                                  |                                                                                                                                                                                                                                                                                                                                                         |
| <p>To compare the effects of the pre-pubertal duration of diabetes on the occurrence of complications in two groups of patients after the same number with years of the disease</p> <p>Cross-sectional design</p> <p>Italy; 11 centres</p> <p>2007 - 2009</p> <p>Patients initially diagnosed and treated between 1981 - 1992, those who were aged 0 - 3 years and those who were in puberty or post-pubertal at the onset of type 1 diabetes; obtained from individual centres but</p>                                                                                                                                                                                                                         | <p><b>DR</b></p> <p>Photography</p>                                                                                                                                                                                                                                                                                                              | <p><b>DR</b></p> <p><i>Entire cohort -</i></p> <p>Any after 20 years diabetes duration: 55%</p> <p>Mild after 20 years diabetes duration: 40%</p> <p>Moderate non-proliferative after 20 years diabetes duration: 9%</p> <p>Severe non-proliferative after 20 years diabetes duration: 4%</p> <p>Proliferative after 20 years diabetes duration: 2%</p> |

|                                                                                                                                                                                                                                                                                                                                                                                                                                                                   |                                                                                                                                                                                                                                                                                                                                                                        |                                                                                                                                                                                                                                                                                                                                                                                                                                                                                                                                                                                                                                                                                                                                                  |
|-------------------------------------------------------------------------------------------------------------------------------------------------------------------------------------------------------------------------------------------------------------------------------------------------------------------------------------------------------------------------------------------------------------------------------------------------------------------|------------------------------------------------------------------------------------------------------------------------------------------------------------------------------------------------------------------------------------------------------------------------------------------------------------------------------------------------------------------------|--------------------------------------------------------------------------------------------------------------------------------------------------------------------------------------------------------------------------------------------------------------------------------------------------------------------------------------------------------------------------------------------------------------------------------------------------------------------------------------------------------------------------------------------------------------------------------------------------------------------------------------------------------------------------------------------------------------------------------------------------|
| <p>sampling strategy unclear</p> <p>n 105 (n 53 (very young pre-pubertal onset); n 52 (pubertal onset)); n 86 assessed for UAE; n 89 assessed for HT</p> <p>*Age: 22.0 (4.5) years (very young pre-pubertal onset); 31.6 (4.1) years (pubertal onset)</p> <p>Male: 43% (41.5% (very young pre-pubertal onset); 44.2% (pubertal onset))</p> <p>*Diabetes duration: 19.7 (4.0) (range 15 - 28.5) years; n 69 (&lt; 20 years); n 36 (<math>\geq</math> 20 years)</p> | <p><b>Nephropathy</b><br/> UAE or AER -<br/> Microalbuminuria: UAE 30 - 300 mg/day or AER <math>\geq</math> 20 <math>\mu</math>g/min<br/> Macroalbuminuria: UAE &gt; 300 mg day or AER &gt; 150 <math>\mu</math>g/min</p> <p><b>HT</b><br/> BP was measured using a standard sphygmomanometer with patients seated, and calculated as the mean of two measurements</p> | <p><i>Very young pre-pubertal-onset group -</i><br/> Any: 40%<br/> Mild: 30%<br/> Moderate to severe: 10%<br/> Any &lt; 20 years diabetes duration: 27%<br/> Any &gt; 20 years diabetes duration: 88%</p> <p><i>Pubertal onset group -</i><br/> Any: 71%<br/> Mild: 52%<br/> Moderate to severe: 20%<br/> Any &lt; 20 years diabetes duration: 63%<br/> Any &gt; 20 years diabetes duration: 63%</p> <p><b>Nephropathy</b><br/> <i>Entire cohort -</i><br/> Abnormal UAE: 7%</p> <p><i>Very young pre-pubertal-onset group -</i><br/> Abnormal UAE: 4%</p> <p><i>Pubertal onset group -</i><br/> Abnormal UAE: 9%</p> <p><b>HT</b><br/> <i>Entire cohort -</i><br/> Any: 3%</p> <p><i>Very young pre-pubertal-onset group -</i><br/> Any: 0%</p> |
|-------------------------------------------------------------------------------------------------------------------------------------------------------------------------------------------------------------------------------------------------------------------------------------------------------------------------------------------------------------------------------------------------------------------------------------------------------------------|------------------------------------------------------------------------------------------------------------------------------------------------------------------------------------------------------------------------------------------------------------------------------------------------------------------------------------------------------------------------|--------------------------------------------------------------------------------------------------------------------------------------------------------------------------------------------------------------------------------------------------------------------------------------------------------------------------------------------------------------------------------------------------------------------------------------------------------------------------------------------------------------------------------------------------------------------------------------------------------------------------------------------------------------------------------------------------------------------------------------------------|

|                                                                                                                                                                                                                                                                                                                                                                                                                                                                                                                                                                                                                                                                                                                                                                                                                                                                                                                                             |                                                                                                                                                                                                                                                          |                                                                                                                                                                                                                                                                                                                                                                                                |
|---------------------------------------------------------------------------------------------------------------------------------------------------------------------------------------------------------------------------------------------------------------------------------------------------------------------------------------------------------------------------------------------------------------------------------------------------------------------------------------------------------------------------------------------------------------------------------------------------------------------------------------------------------------------------------------------------------------------------------------------------------------------------------------------------------------------------------------------------------------------------------------------------------------------------------------------|----------------------------------------------------------------------------------------------------------------------------------------------------------------------------------------------------------------------------------------------------------|------------------------------------------------------------------------------------------------------------------------------------------------------------------------------------------------------------------------------------------------------------------------------------------------------------------------------------------------------------------------------------------------|
|                                                                                                                                                                                                                                                                                                                                                                                                                                                                                                                                                                                                                                                                                                                                                                                                                                                                                                                                             | HT: > 140/90 mmHg                                                                                                                                                                                                                                        | <i>Pubertal onset group - Any: 7%</i>                                                                                                                                                                                                                                                                                                                                                          |
| <b>Schwab et al. 2006</b>                                                                                                                                                                                                                                                                                                                                                                                                                                                                                                                                                                                                                                                                                                                                                                                                                                                                                                                   |                                                                                                                                                                                                                                                          |                                                                                                                                                                                                                                                                                                                                                                                                |
| <p>To ascertain the type and prevalence rate, age and sex distribution of cardiovascular risk factors in type 1 diabetic patients up to 26 years of age</p> <p>Cross-sectional design, documentation survey</p> <p>Germany and Austria; 195 centres</p> <p>2003 - 2004</p> <p>Sampled consecutive cases from a joint-national register; inclusion criteria: type 1 diabetes.</p> <p>n 27,358 (n 25,184 assessed for raised systolic BP; n 25,178 assessed for raised diastolic BP; n 27,358 assessed for HT treatment)</p> <p>Cohort divided into pre-pubertal (0.25 - 11 years), pubertal (12 - 16 years) and young adulthood (17 - 26 years) based upon developmental stage</p> <p>Size of each cohort unclear</p> <p>*Age: 7.5 (2.5) years (pre-pubertal); 13.7 (1.4) years (pubertal); 18.5 (2.3) years (young adulthood) (P &lt; 0.0001)</p> <p>Male: 51.7% (pre-pubertal); 51.7% (pubertal); 52.5% (young adulthood) (P value NS)</p> | <p><b>HT</b><br/>Use of a sphygmomanometer. Median value calculated from at least three measurements</p> <p>HT: Average systolic or diastolic BP <math>\geq</math> to the 95<sup>th</sup> percentile for age and sex. Values not provided for adults</p> | <p><b>HT</b><br/>Systolic: 8.1%<br/>Diastolic: 2.5%<br/>Raised systolic BP: 5.8% (pre-pubertal); 7.4% (pubertal); 11% (young adulthood); p &lt; 0.0001<br/>Raised diastolic BP: 3.9% (pre-pubertal); 3.2% (pubertal); 2.6% (young adulthood); p &lt; 0.0001<br/>Receiving anti-hypertensive medication: 2.1% (0.2% (pre-pubertal); 1.4% (pubertal); 4.8% (young adulthood)); p &lt; 0.0001</p> |

\*Diabetes duration: 2.5 (2.3) years (pre-pubertal); 4.9 (3.6) years (pubertal); 8.2 (4.8) years (young adulthood) (P < 0.0001)

(ACR) Albumin-creatinine ratio (AER) Albumin excretion rate (BP) Blood pressure (DR) Diabetic retinopathy  
(HT) Hypertension (n) Number (OR) Odds ratio (P) Probability (UAE) Urinary albumin excretion \*Mean (SD)
